# Supplementary material for: Single-cell transcriptome analysis of embryonic and adult endothelial cells allows to rank the hemogenic potential of post-natal endothelium
Source: bioRxiv or medRxiv preprint supplement (doi:10.1101/2021.06.16.447688), 2021-10-16
Supplement: Supplementary file [file media-2.pdf]

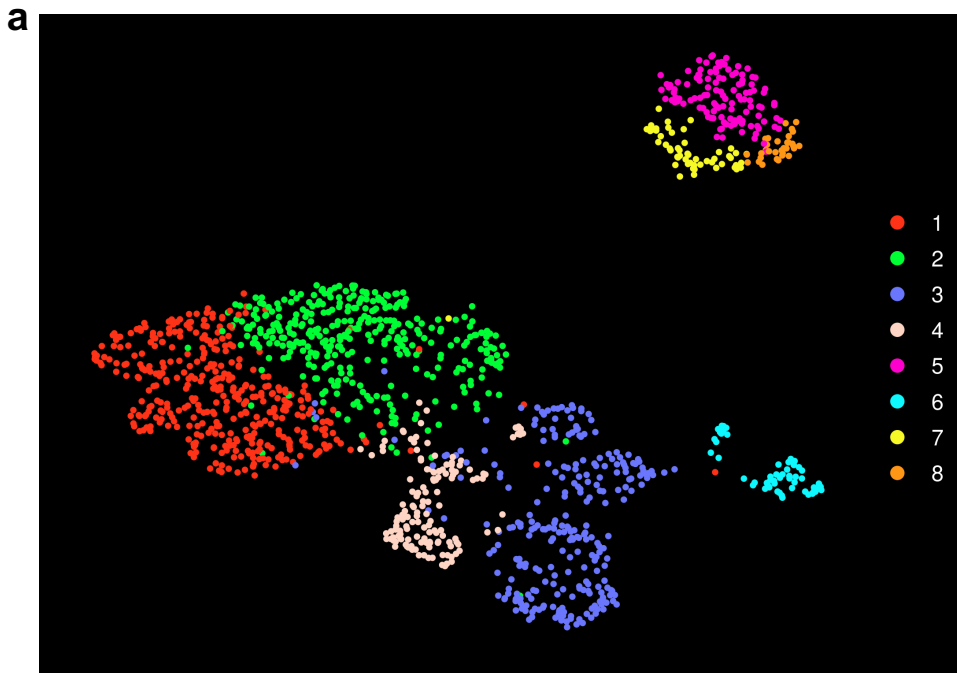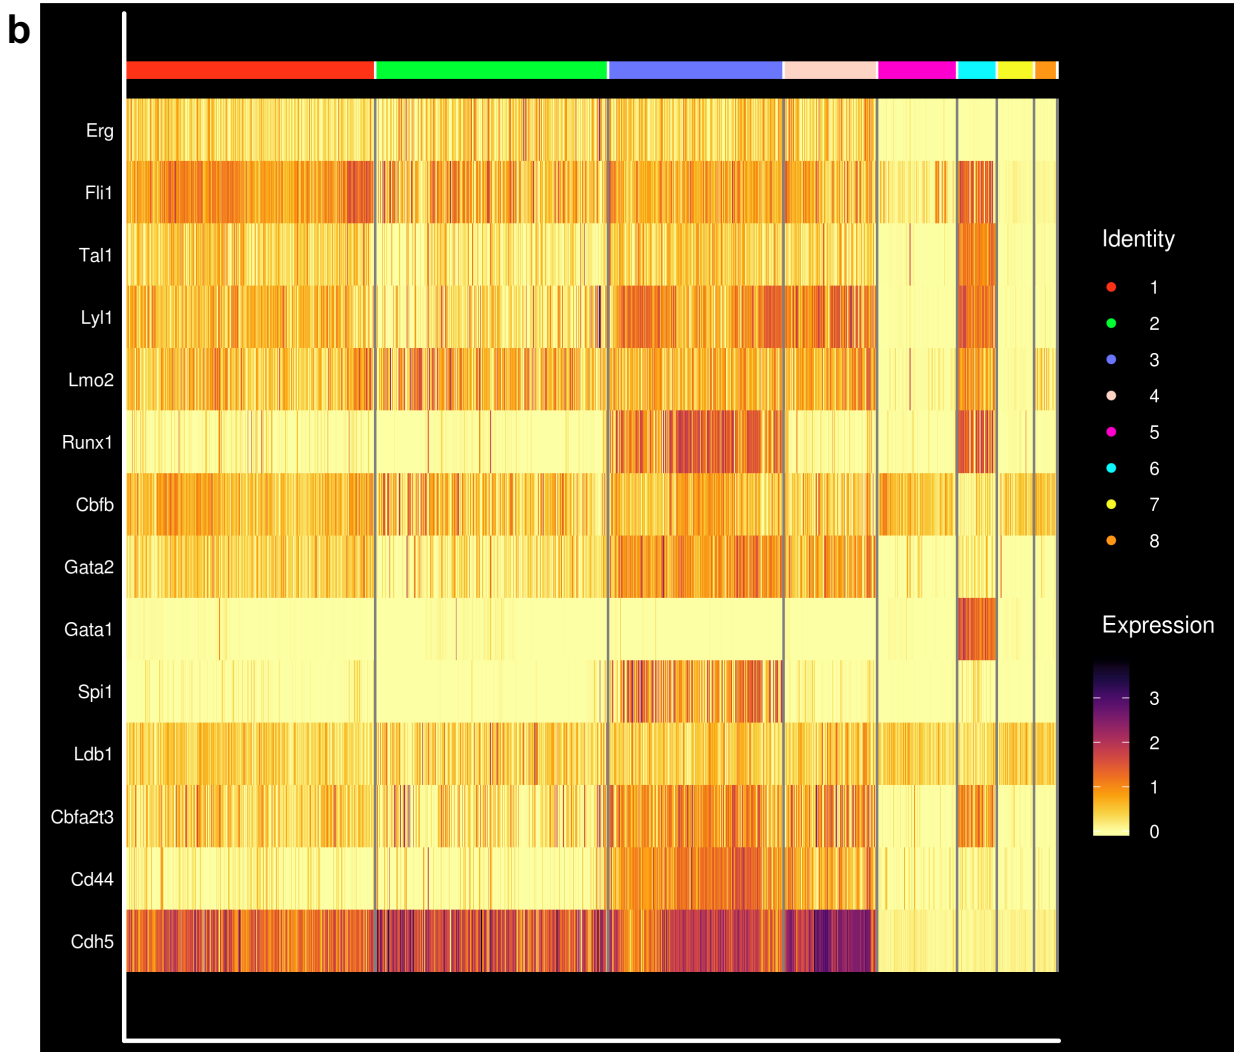

**Supplementary Figure 2: Clustering analysis of Embryo\_dataset\_1. a) UMAP plots showing the clustering analysis result; b) Gene expression heatmap for a selection of key genes involved in the EHT process.**
