# Supplementary material for: Single-cell transcriptome analysis of embryonic and adult endothelial cells allows to rank the hemogenic potential of post-natal endothelium
Source: bioRxiv or medRxiv preprint supplement (doi:10.1101/2021.06.16.447688), 2021-10-16
Supplement: Supplementary file [file media-3.pdf]

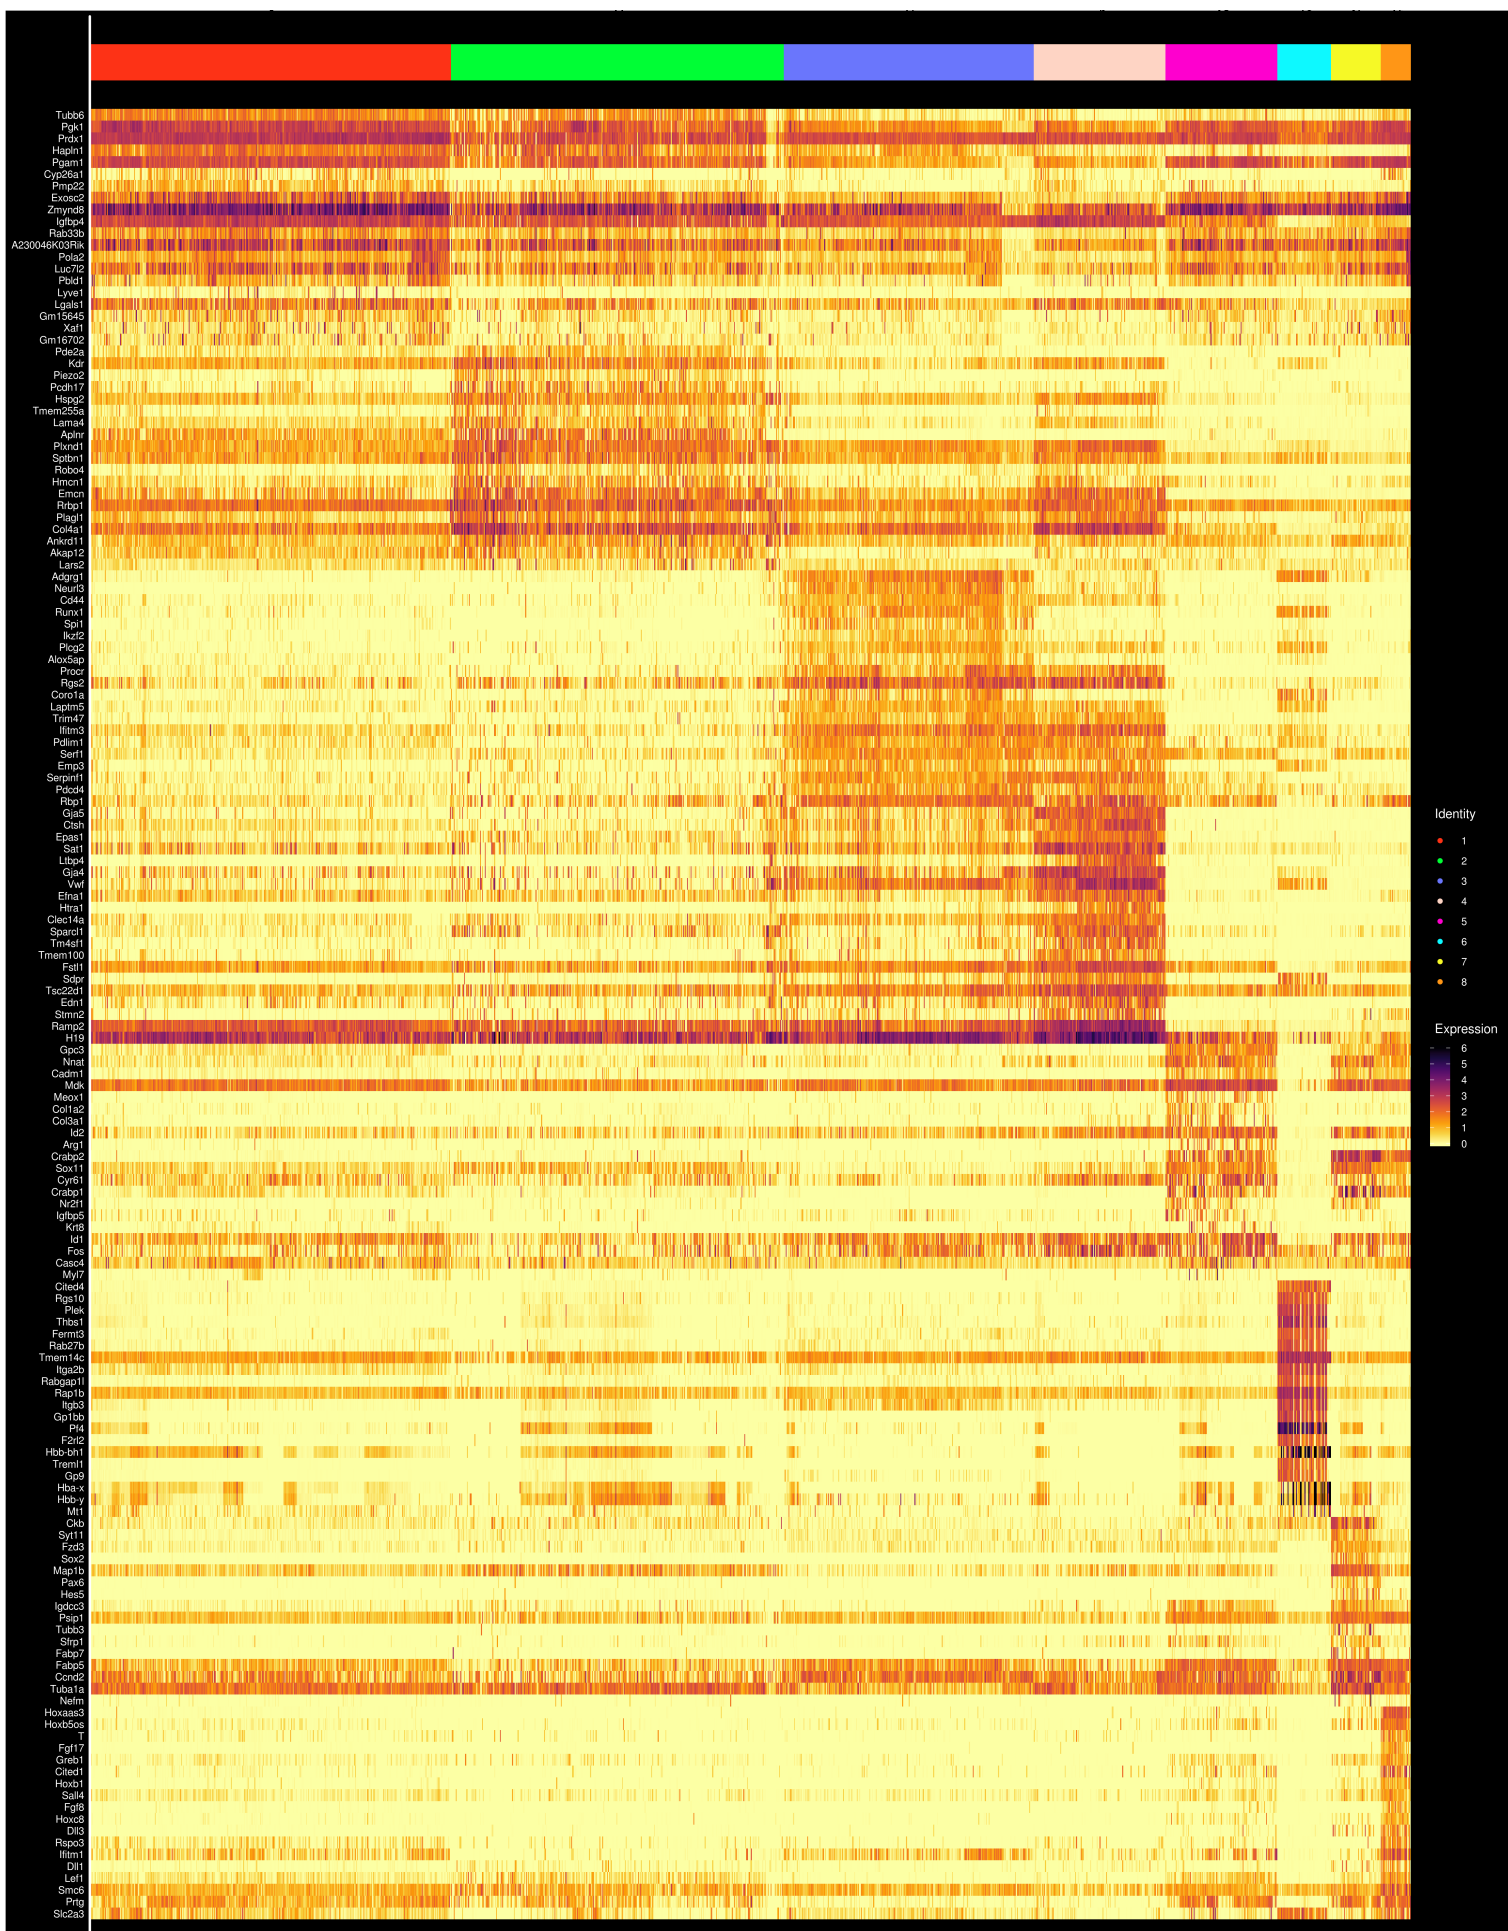

**Supplementary Figure 3: Marker genes of Embryo\_dataset\_1 clusters.**  
 Expression heatmap for marker genes for the eight indicated clusters.
