# Supplementary material for: Single-cell transcriptome analysis of embryonic and adult endothelial cells allows to rank the hemogenic potential of post-natal endothelium
Source: bioRxiv or medRxiv preprint supplement (doi:10.1101/2021.06.16.447688), 2021-10-16
Supplement: Supplementary file [file media-4.pdf]

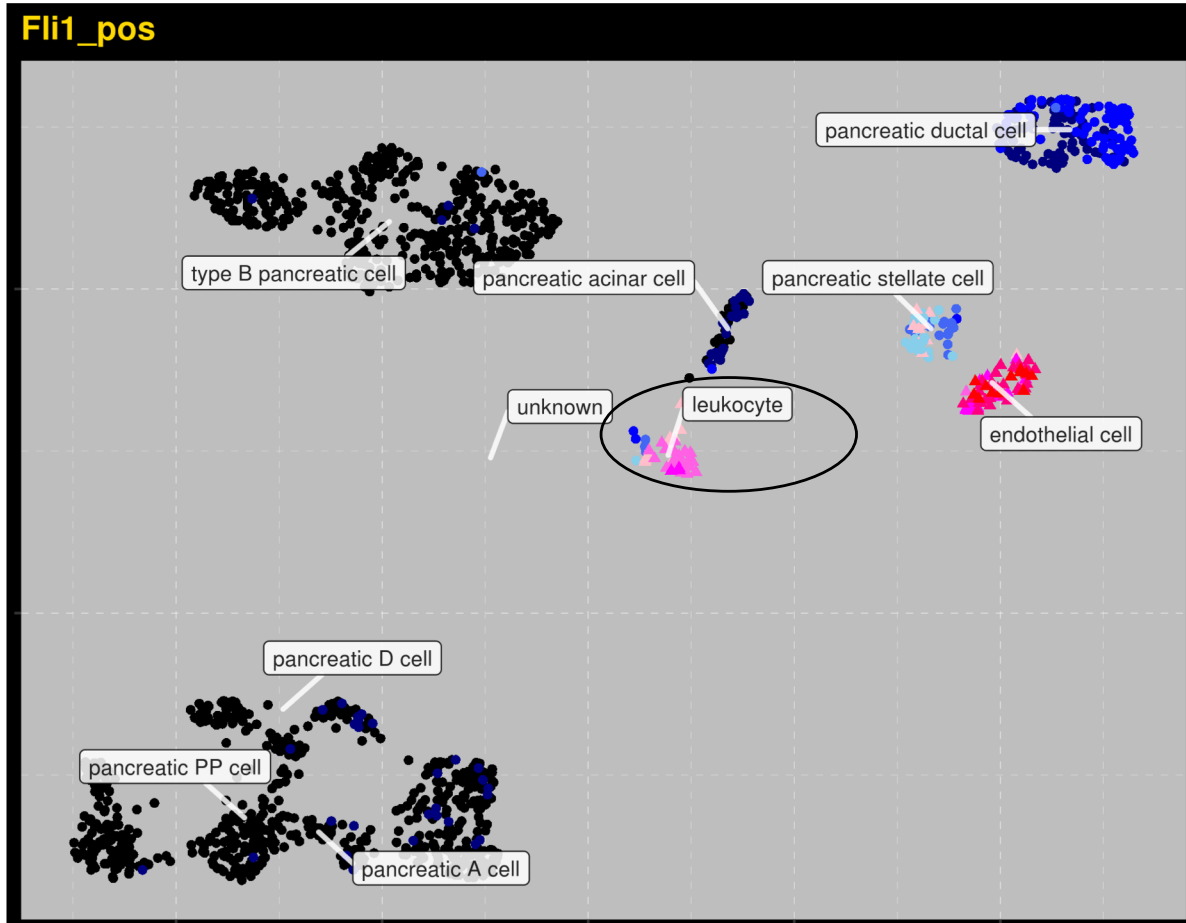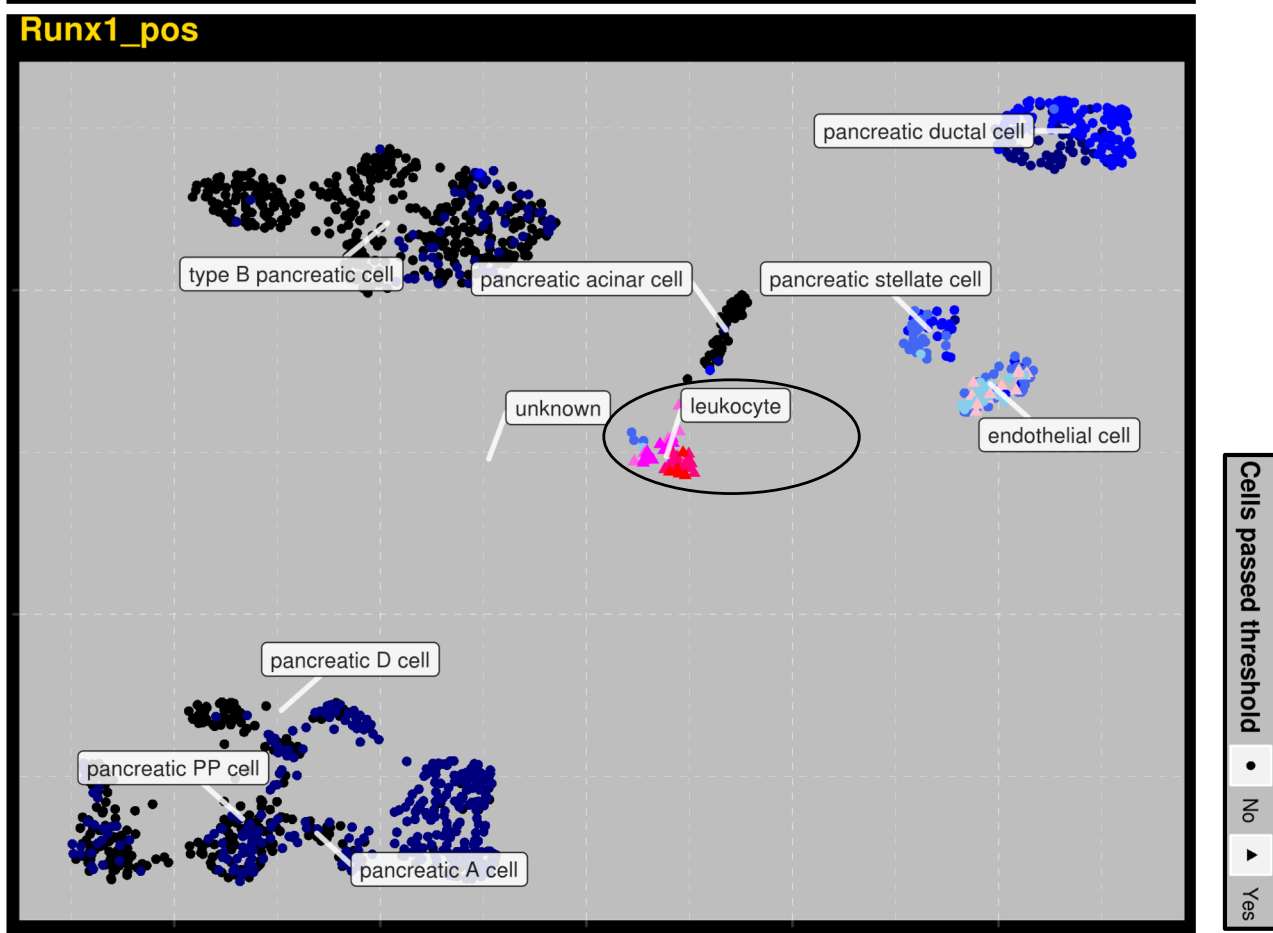

**Supplementary Figure 4: Overlap of genes between Fli1 and Runx1 only in leukocytes cluster.** UMAP plot highlighting the clusters in which the target genes of a given seed TFs are expressed. Only positive relationships are highlighted. The ellipse shows the leukocytes cell cluster. Colors represent AUC value – cells that passed AUC threshold colored in pink, others in blue.
