# Supplementary material for: Single-cell transcriptome analysis of embryonic and adult endothelial cells allows to rank the hemogenic potential of post-natal endothelium
Source: bioRxiv or medRxiv preprint supplement (doi:10.1101/2021.06.16.447688), 2021-10-16
Supplement: Supplementary file [file media-5.pdf]

| <b>Gene symbol</b> | <b>Number of common tissues</b> | <b>Name of tissues</b>                        |
|--------------------|---------------------------------|-----------------------------------------------|
| <i>Cd63</i>        | 5                               | fat, kidney, limb_muscle, lung, trachea       |
| <i>Gsn</i>         | 5                               | fat, heart, kidney, limb_muscle, trachea      |
| <i>Mt1</i>         | 5                               | diaphragm, fat, kidney, limb_muscle, trachea  |
| <i>Myl9</i>        | 5                               | brain, diaphragm, fat, limb_muscle, trachea   |
| <i>Rgs5</i>        | 5                               | aorta, brain, diaphragm, limb_muscle, trachea |
| <i>Acta2</i>       | 4                               | diaphragm, fat, limb_muscle, trachea          |
| <i>Art3</i>        | 4                               | brain, diaphragm, kidney, mammary_gland       |
| <i>Bgn</i>         | 4                               | brain, kidney, limb_muscle, trachea           |
| <i>Cd44</i>        | 4                               | diaphragm, kidney, limb_muscle, mammary_gland |
| <i>Ndr2</i>        | 4                               | aorta, diaphragm, limb_muscle, trachea        |
| <i>Notch2</i>      | 4                               | aorta, diaphragm, kidney, limb_muscle         |
| <i>Pex7</i>        | 4                               | aorta, kidney, limb_muscle, lung              |
| <i>Stip1</i>       | 4                               | aorta, fat, kidney, mammary_gland             |

**Supplementary Table 1: Identification of marker genes in Runx1<sup>+</sup> adult endothelial populations**
